# Supplementary material for: B3GNT3 overexpression promotes tumor progression and inhibits infiltration of CD8+ T cells in pancreatic cancer
Source: publisher site journal article supplement (doi:10.18632/aging.202255), 2020-12-09
Supplement: Supplementary file [file aging-v13i2-202255-supplementary-material-SD1.pdf]

# SUPPLEMENTARY FIGURES

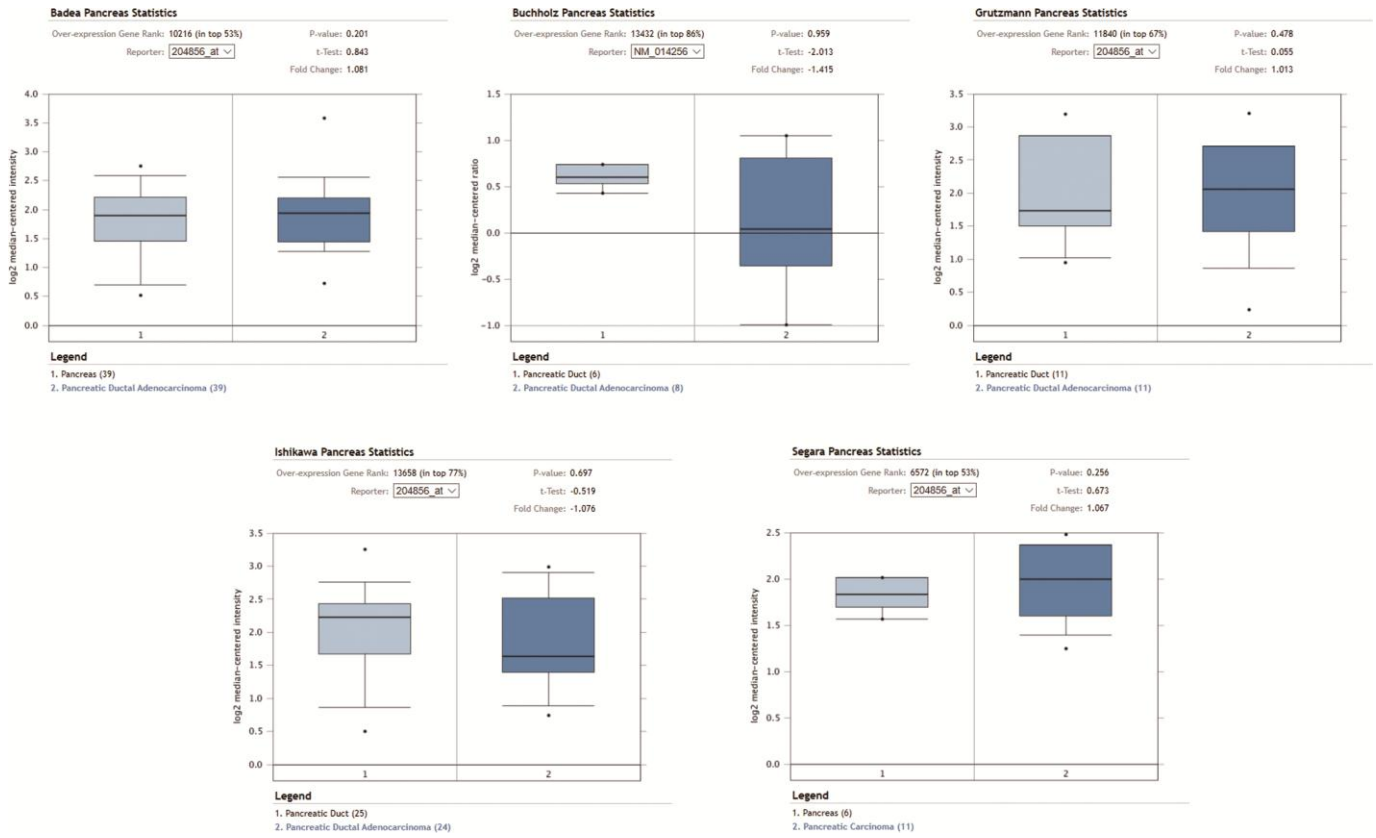

Supplementary Figure 1. *B3GNT3* expression analysis based on the other five studies in the OncoPrint database.

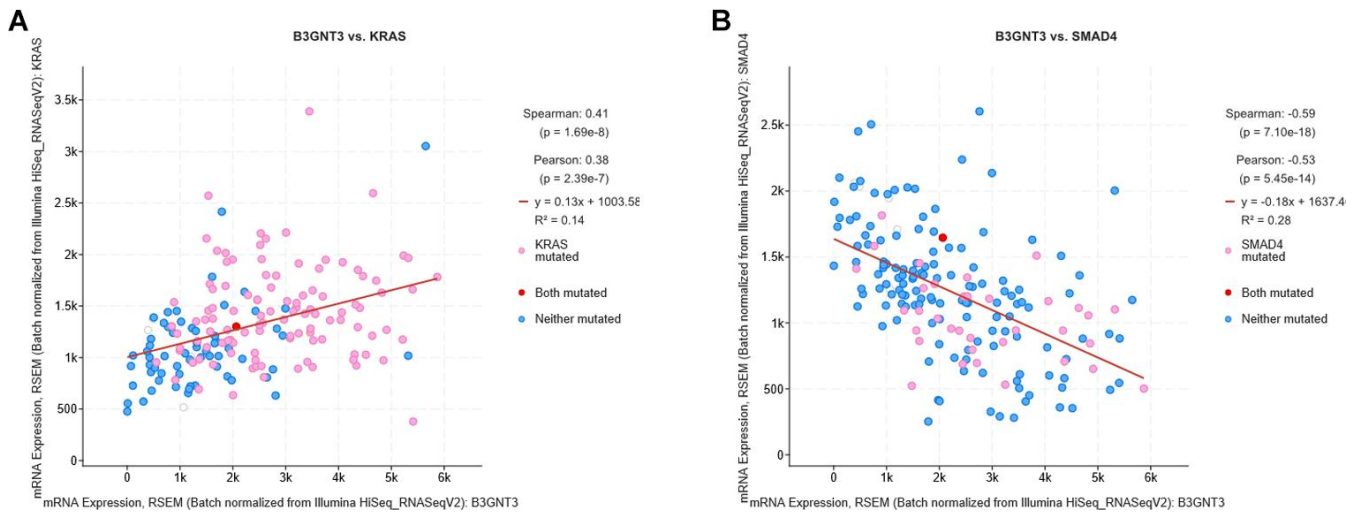

Supplementary Figure 2. Validation of the association among *B3GNT3*, *KRAS*, and *SMAD4* using cBioportal database. (A) *B3GNT3* expression was positively correlated to *KRAS* expression. (B) *B3GNT3* expression was negatively correlated to *SMAD4* expression.

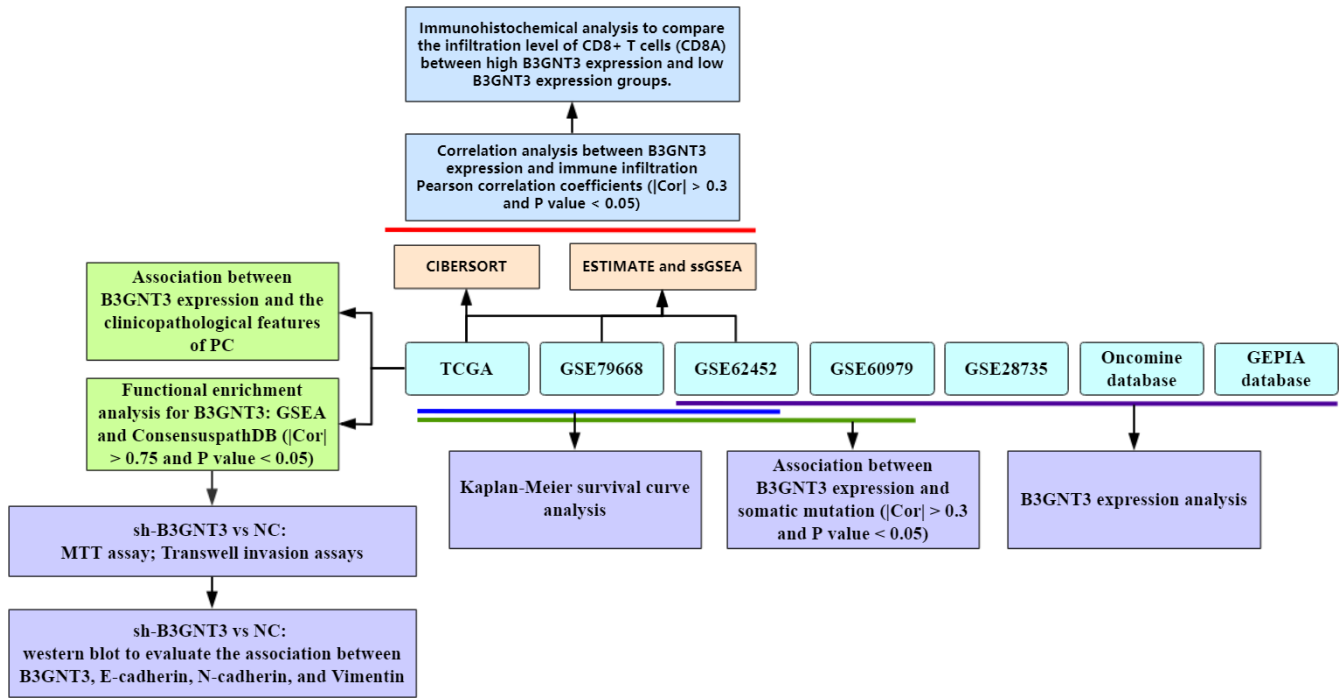

Supplementary Figure 3. Flowchart of the whole study.
